# Supplementary material for: Computational Simulation of Intervention Targets: Elucidating Coping Style Mechanisms in Anxiety and Depressive Symptom Networks Among Community-Based Populations
Source: Research Square preprint supplement (doi:10.21203/rs.3.rs-7909798/v1), 2025-11-11
Supplement: Supplementary file 1 [file fc66ee43e977e6ee1f24e30e.docx]

**Appendix A**

**Table 3. Summary of simulated exacerbation and mitigation node values**

| Threshold Iteration | **aggravating** | | | **alleviating** | | |
| --- | --- | --- | --- | --- | --- | --- |
| Mean Sum Score | Confidence Interval Lower | Confidence Interval Upper | Mean Sum Score | Confidence Interval Lower | Confidence Interval Upper |
| **18-49** | | | | | | |
| original | 5.623 | 5.548 | 5.698 | 5.703 | 5.627 | 5.780 |
| SCSQ-1 | 6.222 | 6.156 | 6.288 | 4.288 | 4.208 | 4.368 |
| SCSQ-2 | 6.222 | 6.156 | 6.288 | 4.132 | 4.049 | 4.215 |
| SCSQ-3 | 6.268 | 6.203 | 6.333 | 4.064 | 3.980 | 4.147 |
| SCSQ-4 | 6.379 | 6.315 | 6.444 | 4.142 | 4.059 | 4.224 |
| SCSQ-5 | 6.794 | 6.727 | 6.861 | 4.445 | 4.376 | 4.514 |
| SCSQ-6 | 6.921 | 6.851 | 6.992 | 4.866 | 4.797 | 4.935 |
| SCSQ-7 | 6.887 | 6.817 | 6.956 | 4.621 | 4.553 | 4.690 |
| SCSQ-8 | 6.790 | 6.718 | 6.862 | 4.878 | 4.808 | 4.948 |
| GAD-1 | 5.905 | 5.826 | 5.984 | 5.576 | 5.503 | 5.650 |
| GAD-2 | 5.973 | 5.894 | 6.051 | 5.638 | 5.564 | 5.711 |
| GAD-3 | 5.984 | 5.901 | 6.066 | 5.563 | 5.489 | 5.636 |
| GAD-4 | 5.981 | 5.901 | 6.061 | 5.580 | 5.506 | 5.654 |
| GAD-5 | 5.817 | 5.739 | 5.895 | 5.621 | 5.547 | 5.694 |
| GAD-6 | 5.877 | 5.799 | 5.956 | 5.573 | 5.498 | 5.648 |
| GAD-7 | 5.799 | 5.722 | 5.876 | 5.691 | 5.619 | 5.764 |
| PHQ-1 | 6.416 | 6.333 | 6.498 | 5.389 | 5.318 | 5.460 |
| PHQ-2 | 6.396 | 6.312 | 6.481 | 5.481 | 5.409 | 5.553 |
| PHQ-3 | 6.235 | 6.154 | 6.317 | 5.493 | 5.421 | 5.566 |
| PHQ-4 | 6.455 | 6.372 | 6.538 | 5.397 | 5.327 | 5.467 |
| PHQ-5 | 6.080 | 5.999 | 6.162 | 5.552 | 5.479 | 5.624 |
| PHQ-6 | 5.879 | 5.799 | 5.959 | 5.602 | 5.529 | 5.676 |
| PHQ-7 | 5.894 | 5.815 | 5.973 | 5.636 | 5.561 | 5.710 |
| PHQ-8 | 5.842 | 5.763 | 5.921 | 5.614 | 5.539 | 5.689 |
| PHQ-9 | 5.703 | 5.626 | 5.780 | 5.637 | 5.562 | 5.711 |
| **50-64** | | | | | | |
| original | 6.546 | 6.459 | 6.633 | 6.644 | 6.558 | 6.731 |
| SCSQ-1 | 7.191 | 7.113 | 7.269 | 5.407 | 5.312 | 5.501 |
| SCSQ-2 | 7.214 | 7.136 | 7.292 | 5.176 | 5.081 | 5.271 |
| SCSQ-3 | 7.195 | 7.117 | 7.274 | 5.375 | 5.279 | 5.471 |
| SCSQ-4 | 7.243 | 7.165 | 7.321 | 5.174 | 5.081 | 5.267 |
| SCSQ-5 | 7.514 | 7.439 | 7.588 | 5.251 | 5.163 | 5.339 |
| SCSQ-6 | 7.567 | 7.490 | 7.644 | 5.360 | 5.274 | 5.446 |
| SCSQ-7 | 7.566 | 7.488 | 7.643 | 5.276 | 5.191 | 5.362 |
| SCSQ-8 | 7.672 | 7.592 | 7.753 | 5.626 | 5.541 | 5.710 |
| GAD-1 | 6.950 | 6.854 | 7.046 | 6.427 | 6.344 | 6.511 |
| GAD-2 | 6.924 | 6.828 | 7.020 | 6.431 | 6.347 | 6.515 |
| GAD-3 | 6.962 | 6.865 | 7.059 | 6.456 | 6.372 | 6.540 |
| GAD-4 | 7.030 | 6.934 | 7.127 | 6.386 | 6.303 | 6.469 |
| GAD-5 | 6.878 | 6.782 | 6.973 | 6.405 | 6.320 | 6.489 |
| GAD-6 | 6.977 | 6.879 | 7.076 | 6.309 | 6.226 | 6.392 |
| GAD-7 | 6.719 | 6.627 | 6.811 | 6.490 | 6.403 | 6.576 |
| PHQ-1 | 7.266 | 7.170 | 7.362 | 6.341 | 6.257 | 6.424 |
| PHQ-2 | 7.236 | 7.139 | 7.334 | 6.381 | 6.299 | 6.464 |
| PHQ-3 | 7.228 | 7.135 | 7.320 | 6.228 | 6.145 | 6.311 |
| PHQ-4 | 7.255 | 7.159 | 7.352 | 6.272 | 6.192 | 6.352 |
| PHQ-5 | 7.063 | 6.968 | 7.158 | 6.408 | 6.325 | 6.490 |
| PHQ-6 | 7.052 | 6.955 | 7.148 | 6.495 | 6.413 | 6.577 |
| PHQ-7 | 6.942 | 6.846 | 7.038 | 6.413 | 6.330 | 6.496 |
| PHQ-8 | 6.897 | 6.805 | 6.989 | 6.410 | 6.327 | 6.494 |
| PHQ-9 | 6.719 | 6.627 | 6.810 | 6.397 | 6.312 | 6.482 |
| **≥65** | | | | | | |
| original | 8.079 | 7.983 | 8.175 | 8.043 | 7.949 | 8.137 |
| SCSQ-1 | 8.386 | 8.299 | 8.473 | 7.150 | 7.048 | 7.251 |
| SCSQ-2 | 8.423 | 8.336 | 8.511 | 7.070 | 6.966 | 7.174 |
| SCSQ-3 | 8.090 | 7.993 | 8.187 | 8.033 | 7.937 | 8.129 |
| SCSQ-4 | 8.532 | 8.443 | 8.621 | 7.087 | 6.985 | 7.189 |
| SCSQ-5 | 8.533 | 8.442 | 8.624 | 6.935 | 6.832 | 7.038 |
| SCSQ-6 | 8.415 | 8.329 | 8.501 | 6.829 | 6.728 | 6.931 |
| SCSQ-7 | 8.508 | 8.421 | 8.595 | 6.906 | 6.806 | 7.006 |
| SCSQ-8 | 8.697 | 8.611 | 8.782 | 6.804 | 6.706 | 6.903 |
| GAD-1 | 8.762 | 8.674 | 8.850 | 6.856 | 6.758 | 6.953 |
| GAD-2 | 8.857 | 8.771 | 8.942 | 6.758 | 6.664 | 6.851 |
| GAD-3 | 9.023 | 8.934 | 9.113 | 6.973 | 6.884 | 7.062 |
| GAD-4 | 8.925 | 8.812 | 9.037 | 7.666 | 7.581 | 7.752 |
| GAD-5 | 8.790 | 8.679 | 8.900 | 7.694 | 7.608 | 7.779 |
| GAD-6 | 9.014 | 8.898 | 9.130 | 7.663 | 7.578 | 7.749 |
| GAD-7 | 8.947 | 8.832 | 9.063 | 7.681 | 7.597 | 7.765 |
| PHQ-1 | 8.713 | 8.601 | 8.824 | 7.752 | 7.664 | 7.839 |
| PHQ-2 | 8.969 | 8.855 | 9.083 | 7.651 | 7.569 | 7.734 |
| PHQ-3 | 8.611 | 8.504 | 8.719 | 7.834 | 7.746 | 7.923 |
| PHQ-4 | 9.057 | 8.949 | 9.164 | 7.422 | 7.341 | 7.504 |
| PHQ-5 | 9.042 | 8.932 | 9.152 | 7.485 | 7.400 | 7.570 |
| PHQ-6 | 8.891 | 8.789 | 8.993 | 7.439 | 7.354 | 7.523 |
| PHQ-7 | 9.083 | 8.974 | 9.191 | 7.569 | 7.485 | 7.652 |
| PHQ-8 | 8.965 | 8.852 | 9.079 | 7.525 | 7.440 | 7.610 |
| PHQ-9 | 8.921 | 8.808 | 9.034 | 7.619 | 7.532 | 7.705 |
